# Supplementary material
Source: publisher figshare collection journal article supplement (https://frontiersin.figshare.com/ndownloader/files/24603110)
Supplement: Supplementary file [file 24603110]

## **Appendix A:**

| <b>Steps</b>                | <b>Tasks</b>                                                                  | <b>Tools</b>                                                                                                                                                                                        |
|-----------------------------|-------------------------------------------------------------------------------|-----------------------------------------------------------------------------------------------------------------------------------------------------------------------------------------------------|
| Step 1 Prepare together     | Read the vision of HHR                                                        | <ul style="list-style-type: none"> <li>– Information about the roles within HHR</li> <li>– Explanation about level of dialogue and involvement at each step</li> </ul>                              |
|                             | Compose a project team                                                        | <ul style="list-style-type: none"> <li>– Communication tips &amp; fill-in template to create a project group for development</li> </ul>                                                             |
|                             | Develop a project planning                                                    | <ul style="list-style-type: none"> <li>– Information and guidelines for project planning</li> <li>– Information and guidelines for project timeline</li> </ul>                                      |
|                             | Create commitment and involvement at all levels                               | <ul style="list-style-type: none"> <li>– Fill-in HHR poster template</li> <li>– Fill-in HHR presentation template</li> <li>– HHR Flyer</li> </ul>                                                   |
| Step 2 Measuring is knowing | Plan, spread, and conduct needs assessment                                    | <ul style="list-style-type: none"> <li>– Communication tips &amp; checklist to conduct a needs assessment</li> <li>– Checklist privacy</li> <li>– “Healthy at work” Questionnaire</li> </ul>        |
|                             | Analyze results of the needs assessment                                       | <ul style="list-style-type: none"> <li>– Manual questionnaire analysis</li> <li>– Fill-in report template for results of needs assessment for management</li> </ul>                                 |
| Step 3 Our problems         | Communicate the outcomes of needs assessment to employees                     | <ul style="list-style-type: none"> <li>– Fill-in presentation template for employees – traffic light model (red - take action; orange - prevent further deterioration; green - maintain)</li> </ul> |
|                             | Brainstorm about relevant problems other than the results of needs assessment | <ul style="list-style-type: none"> <li>– Communication tips &amp; working form for brainstorming – post-its</li> </ul>                                                                              |
|                             | Prioritize the most important problems                                        | <ul style="list-style-type: none"> <li>– Communication tips &amp; working form for prioritizing</li> </ul>                                                                                          |
|                             | Inform all employees about the problem analyses                               | <ul style="list-style-type: none"> <li>– Communication tips &amp; fill-in poster template for top 3 problems</li> </ul>                                                                             |
| Step 4 Our solutions        | Identify and review existing solutions (evidence-based)                       | <ul style="list-style-type: none"> <li>– Library: two matrices. Matrix 1 with simple solutions. Matrix 2: examples of scientific evidence-based interventions.</li> </ul>                           |

|                                                   |                                                   |                                                                                                                                                                                                                                                                        |
|---------------------------------------------------|---------------------------------------------------|------------------------------------------------------------------------------------------------------------------------------------------------------------------------------------------------------------------------------------------------------------------------|
|                                                   |                                                   | <ul style="list-style-type: none"> <li>– Overview of useful websites</li> <li>– Checklist to develop an intervention by the organization</li> </ul>                                                                                                                    |
|                                                   | Brainstorm about possible solutions               | <ul style="list-style-type: none"> <li>– Communication tips &amp; working form to conduct ideas about solutions on the work floor</li> <li>– Working form for brainstorming – post-its &amp; brainwriting</li> </ul>                                                   |
|                                                   | Prioritize the best fitting solutions             | <ul style="list-style-type: none"> <li>– Working form – select top 3 solutions per problem – criteria for prioritizing solutions: feasibility, costs, time, effect.</li> <li>– Working form – formulation of SMART solutions &amp; fill-in template</li> </ul>         |
|                                                   | Vote by employees on the best solutions           | <ul style="list-style-type: none"> <li>– Fill-in voting cards template for employees to vote on the best solution</li> </ul>                                                                                                                                           |
|                                                   | Communicate about the selected solutions          | <ul style="list-style-type: none"> <li>– Communication tips &amp; fill-in poster template for selected solutions</li> </ul>                                                                                                                                            |
| Step 5 Action plan                                | Decision: How to approach the selected solutions? | <ul style="list-style-type: none"> <li>– Preparation tips for management meeting &amp; fill-in sheet for preparation and decision document</li> <li>– Letter template for management</li> <li>– Communication tips &amp; checklist for adaptation solutions</li> </ul> |
|                                                   | Develop an action plan                            | <ul style="list-style-type: none"> <li>– Communication tips &amp; fill-in sheet action plan (W-questions)</li> <li>– Communication tips &amp; fill-in template to create a project group for implementation</li> </ul>                                                 |
|                                                   | Communicate about the action plan                 | <ul style="list-style-type: none"> <li>– Communication tips &amp; fill-in action plan poster template</li> </ul>                                                                                                                                                       |
| Step 6 Let's start                                | Implement the action plan                         | <ul style="list-style-type: none"> <li>– Communication tips &amp; checklist implementation</li> </ul>                                                                                                                                                                  |
|                                                   | Periodic evaluation                               | <ul style="list-style-type: none"> <li>– Communication tips and approach for evaluation</li> <li>– Working form for evaluation methods</li> </ul>                                                                                                                      |
| Step 7 Evaluation                                 | Conduct a final evaluation                        | <ul style="list-style-type: none"> <li>– Communication tips &amp; approach for evaluation</li> <li>– Working form for evaluation methods</li> </ul>                                                                                                                    |
|                                                   | Plan for sustaining the successful solutions      | <ul style="list-style-type: none"> <li>– Sustainability checklist</li> </ul>                                                                                                                                                                                           |
| Step 8 Along the way:<br>Obstacles in the process |                                                   | <ul style="list-style-type: none"> <li>– Tips of do's and don'ts within a dialogue</li> <li>– Working form to improve collaboration</li> </ul>                                                                                                                         |
